# Supplementary material for: The adenosine analog prodrug ATV006 is orally bioavailable and has preclinical efficacy against parental SARS-CoV-2 and variants
Source: PubMed Central journal article supplement (PMC9161374; doi:10.1126/scitranslmed.abm7621), 2022-05-17
Supplement: scitranslmed.abm7621_sm.pdf [file scitranslmed.abm7621_sm.pdf]

Supplementary Materials for

**The adenosine analog prodrug ATV006 is orally bioavailable and has preclinical efficacy against parental SARS-CoV-2 and variants**

Liu Cao *et al.*

Corresponding authors: Deyin Guo, [guodeyin@mail.sysu.edu.cn](mailto:guodeyin@mail.sysu.edu.cn); Xumu Zhang, [zhangxm@sustech.edu.cn](mailto:zhangxm@sustech.edu.cn);  
Jincun Zhao [zhaojincun@gird.cn](mailto:zhaojincun@gird.cn); Yingjun Li, [liyj@sustech.edu.cn](mailto:liyj@sustech.edu.cn)  
DOI: 10.1126/scitranslmed.abm7621

**The PDF file includes:**

Figs. S1 to S6  
Tables S1 to S7

**Other Supplementary Material for this manuscript includes the following:**

MDAR Reproducibility Checklist  
Data file S1

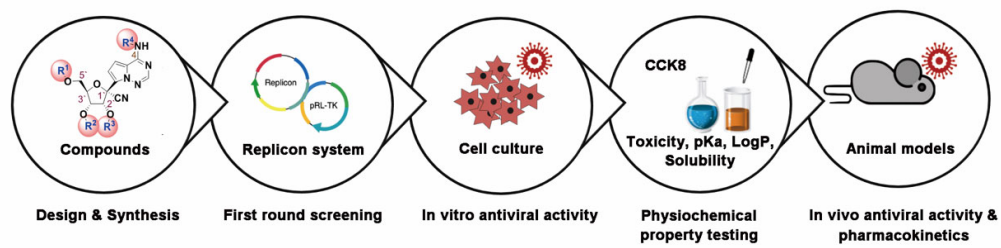

**Fig. S1.** A flow chart for selecting candidate compounds for further testing.

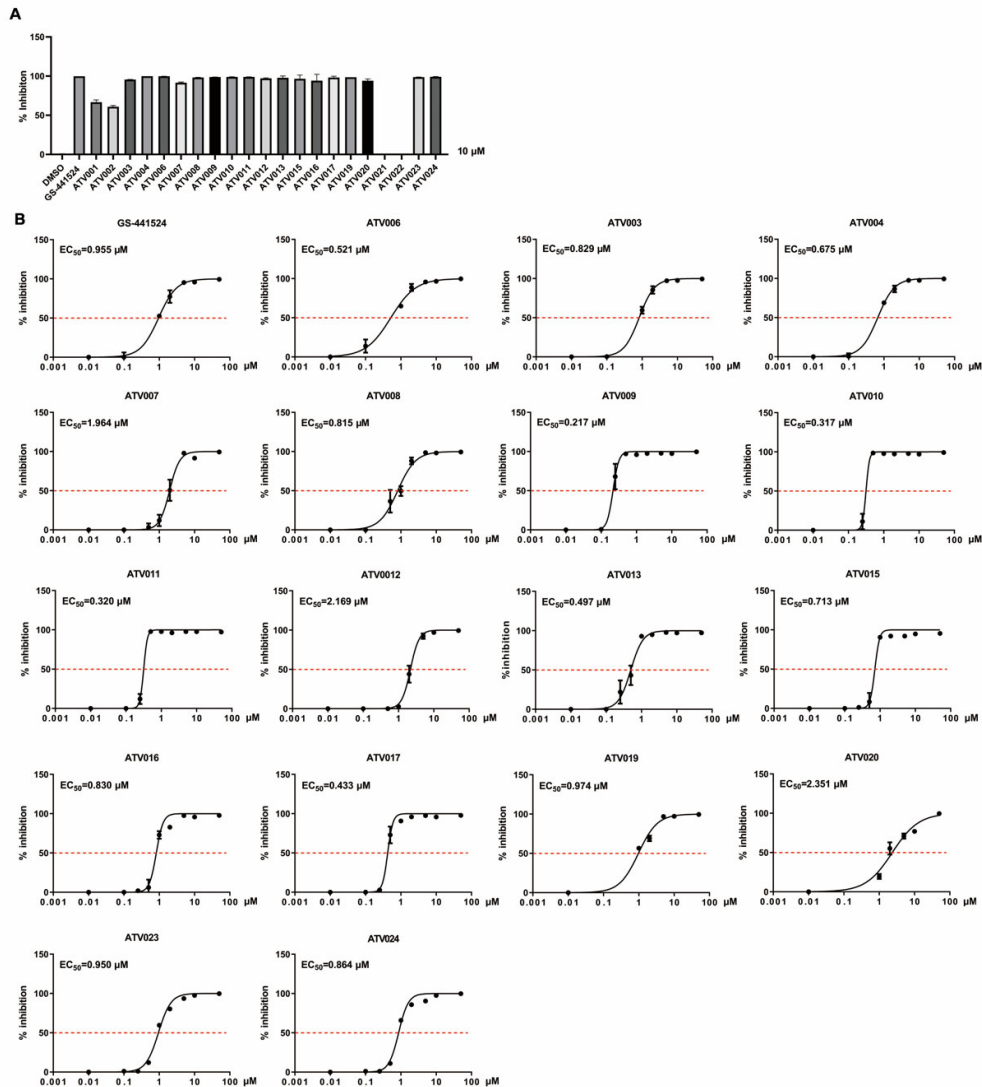

**Fig. S2. Antiviral activity of 21 compounds in SARS-CoV-2 replicon system.**

(A) HEK 293T cells transfected with SARS-CoV-2-Rep-Luci were treated with dimethyl sulfoxide (DMSO) or one of 21 compounds at 10  $\mu\text{M}$ . At 60 hours post-transfection, the cells were analyzed by a luciferase reporter assay. (B) Each indicated compound was evaluated to determine the concentration for 50% of maximal effect ( $\text{EC}_{50}$ ), which is indicated above each plot and shown by the red dashed line. Data are presented as mean  $\pm$  SD.

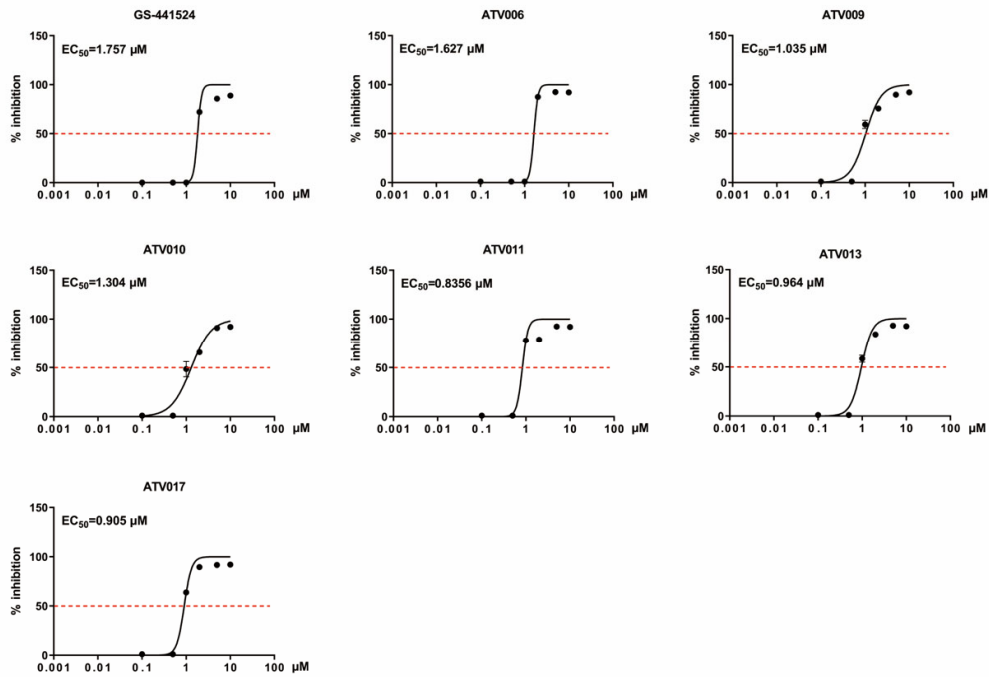

**Fig. S3. Antiviral activity of compounds against SARS-CoV-2 (B.1) in Huh7 cells.**

Huh7 cells were infected with the B.1 strain of SARS-CoV-2 at a multiplicity of infection (MOI) of 0.05 and treated with dilutions of each indicated compound (0, 0.01, 0.1, 0.5, 1, 2, 5 and 10 μM) for 48 hours. Viral yield in the cultured supernatant was then quantified by Quantitative real-time polymerase chain reaction (qRT-PCR) [% inhibition =  $(1 - \text{compound virus copies} / \text{control group virus copies}) \times 100$ ]. The EC<sub>50</sub> values for each compound were determined, which are indicated above each plot and shown by the red dashed line. Data are presented as mean ± SD.

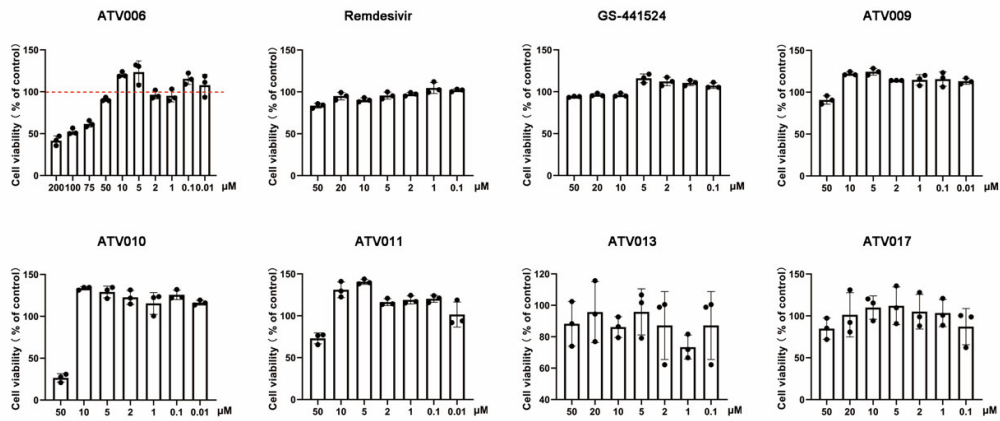

**Fig. S4. Cytotoxicity assay of compounds in Vero E6 cells.**

Vero E6 cells were plated in 96-well plates and treated with increasing concentrations of each indicated compound, ranging from 0 to 200 μM, for 48 hours. Cell viability was tested using Cell Counting Kit-8 (CCK-8). Data are presented as mean ± SD.

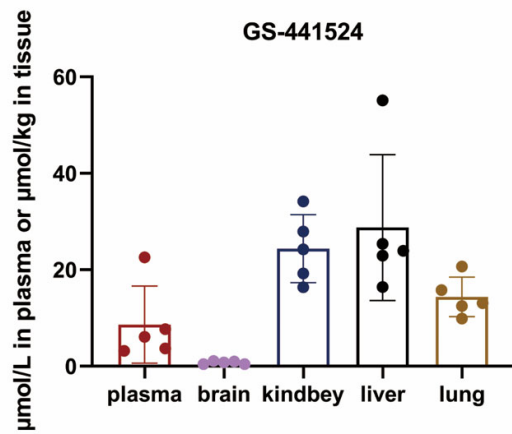

**Fig. S5. The tissue distribution of ATV006 in C57BL/6 mice.**

Tissue distribution of GS-441524 is shown for plasma, brain, lung, liver, and kidney after oral administration of 100 mg/kg ATV006 to C57BL/6 mice (n = 5, mean ± SD).

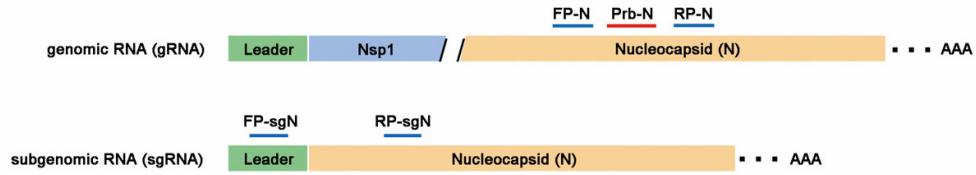

**Fig. S6. Diagram of the genomic RNA (gRNA) and subgenomic RNA (sgRNA) structures of SARS-CoV-2.**

The target positions of the primer/probe set of genomic RNA (gRNA) and subgenomic RNA (sgRNA) of SARS-CoV-2 are shown. In this study, only forward primers (FP) and reverse primers (RP) were used to detect sgRNA of SARS-CoV-2, and no probe (Prb) was used. The sequences of primer and probe sets are listed in table S7. Nsp1, nonstructural protein 1.

**Table S1. Anti-SARS-CoV-2 replicon activity and data analysis of adenosine analogue prodrugs.**

| Compound  | EC <sub>50</sub> *(Confidence 95%) | EC <sub>90</sub> *(Confidence 95%) |
|-----------|------------------------------------|------------------------------------|
| GS-441524 | 0.955 (0.808-1.127)                | 3.252 (2.129-5.666)                |
| ATV006    | 0.521 (0.406-0.668)                | 3.225 (1.849-5.625)                |
| ATV003    | 0.829 (0.704-0.976)                | 2.315 (1.480-3.620)                |
| ATV004    | 0.675 (0.558-0.817)                | 2.067 (1.488-2.873)                |
| ATV007    | 1.964 (1.723-2.238)                | 3.728 (2.422-5.738)                |
| ATV008    | 0.815 (0.665-0.997)                | 3.137 (1.497-6.575)                |
| ATV009    | 0.217 (0.201-0.234)                | 0.313 (0.275-0.357)                |
| ATV010    | 0.317 (0.285-0.350)                | 0.306 (very wide)                  |
| ATV011    | 0.320 (0.296-0.346)                | 0.384 (0.309-0.476)                |
| ATV012    | 2.169 (1.987-2.368)                | 3.511 (2.409-5.117)                |
| ATV013    | 0.497 (0.429-0.575)                | 1.139 (0.699-1.854)                |
| ATV015    | 0.713 (0.678-0.750)                | 0.962 (0.914-1.013)                |
| ATV016    | 0.830 (0.799-0.862)                | 1.229 (1.184-1.277)                |
| ATV017    | 0.433 (0.380-0.493)                | 0.576 (0.478-0.696)                |
| ATV019    | 0.974 (0.6562-1.446)               | 3.814 (1.116-13.030)               |
| ATV020    | 2.351 (1.902-2.906)                | 13.390 (5.090-35.230)              |
| ATV023    | 0.950 (0.830-1.088)                | 2.014 (1.385-2.929)                |
| ATV024    | 0.864 (0.7513-0.9937)              | 1.472 (1.122-1.932)                |

\* denotes  $\mu\text{M}$



**Table S2. Permeability and efflux ratio determination of GS-441524, ATV006, ATV019, and ATV020 in Caco-2 cells.**

| Compound  | Caco-2 AB/BA (Papp (10 <sup>-6</sup> cm/s)) <sup>a</sup> | Efflux ratio |
|-----------|----------------------------------------------------------|--------------|
| GS-441524 | 1.22/1.20                                                | 0.98         |
| ATV006    | 0.51/0.87                                                | 1.7          |
| ATV019    | 0.28/0.68                                                | 2.47         |
| ATV020    | 0.17/0.22                                                | 1.28         |

<sup>a</sup> Papp (A to B) < 2, low permeability; 2 < Papp (A to B) < 10, moderate permeability; Papp (A to B) > 10, high permeability.

**Table S3. Anti-SARS-CoV-2 variant activity and data analysis of adenosine analogue prodrugs in Vero-E6 cells.**

| Compound                        | EC <sub>50</sub> *(Confidence 95%) | EC <sub>90</sub> *(Confidence 95%) |
|---------------------------------|------------------------------------|------------------------------------|
| Remdesivir (B.1)                | 2.279 (2.232-2.326)                | 4.250 (3.950-4.572)                |
| Remdesivir (Beta, B.1.351)      | 1.780 (1.573-2.015)                | 5.016 (3.312-7.598)                |
| Remdesivir (Delta, B.1.617.2)   | 1.645 (1.285-2.1.6)                | 7.342 (2.868-18.800)               |
| Remdesivir (Omicron, B.1.1.529) | 1.238 (1.024-1.497)                | 5.691 (1.936-16.730)               |
| GS-441524 (B.1)                 | 1.709 (1.665-1.775)                | 2.392 (2.305-2.481)                |
| GS-441524 (Beta, B.1.351)       | 1.354 (1.329-1.379)                | 2.316 (2.219-2.417)                |
| GS-441524 (Delta, B.1.617.2)    | 0.957 (0.909-1.008)                | 1.355 (1.042-1.763)                |
| GS-441524 (Omicron, B.1.1.529)  | 0.190 (0.181-0.199)                | 0.363 (0.353-0.373)                |
| ATV006 (B.1)                    | 1.360 (1.299-1.422)                | 2.180 (1.996-2.381)                |
| ATV006 (Beta, B.1.351)          | 1.127 (0.946-1.343)                | 1.358 (0.382-4.828)                |
| ATV006 (Delta, B.1.617.2)       | 0.349 (0.329-0.368)                | 0.506 (0.468-0.547)                |
| ATV006 (Omicron, B.1.1.529)     | 0.106 (0.103-0.110)                | 0.269 (0.265-0.272)                |
| ATV009 (B.1)                    | 1.329 (1.277-1.383)                | 1.526 (very wide)                  |
| ATV009 (Beta, B.1.351)          | 1.484 (1.468-1.500)                | 1.781 (1.773-1.789)                |
| ATV009 (Delta, B.1.617.2)       | 0.492 (0.464-0.523)                | 0.678 (0.492-0.934)                |
| ATV010 (B.1)                    | 0.696 (0.635-0.763)                | 1.199 (0.976-1.473)                |
| ATV010 (Beta, B.1.351)          | 1.002 (0.993-1.011)                | 1.295 (1.006-1.666)                |
| ATV010 (Delta, B.1.617.2)       | 0.457 (0.419-0.493)                | 0.619 (0.510-0.752)                |
| ATV011 (B.1)                    | 2.117 (0.846-5.298)                | 2.636 (very wide)                  |
| ATV011 (Beta, B.1.351)          | 2.302 (2.059-2.573)                | 2.947 (1.335-6.503)                |
| ATV011 (Delta, B.1.617.2)       | 0.408 (0.368-0.453)                | 0.842 (0.676-1.045)                |
| ATV013 (B.1)                    | 2.262 (0.964-5.311)                | 2.866 (very wide)                  |

|                              |                     |                     |
|------------------------------|---------------------|---------------------|
| ATV013 (Beta,<br>B.1.351)    | 2.434 (1.969-3.010) | 3.090 (0.957-9.984) |
| ATV013 (Delta,<br>B.1.617.2) | 0.965 (0.925-1.007) | 1.414 (1.202-1.662) |
| ATV017 (B.1)                 | 2.188 (0.723-6.622) | 2.482 (very wide)   |
| ATV017 (Beta,<br>B.1.351)    | 2.847 (2.415-3.356) | 3.405 (1.817-6.382) |
| ATV017 (Delta,<br>B.1.617.2) | 0.428 (0.303-0.606) | 0.516 (0.449-0.593) |

---

\* denotes  $\mu\text{M}$

**Table S4. Anti-SARS-CoV-2 activity and data analysis of adenosine analogue prodrugs in Huh7 cells.**

| Compound  | EC <sub>50</sub> *(Confidence 95%) | EC <sub>90</sub> *(Confidence 95%) |
|-----------|------------------------------------|------------------------------------|
| GS-441524 | 1.757 (1.408-2.193)                | 2.078 (very wide)                  |
| ATV006    | 1.627 (1.268-2.089)                | 1.955 (very wide)                  |
| ATV009    | 1.035 (0.841-1.275)                | 1.311 (0.993-1.731)                |
| ATV010    | 1.304 (1.054-1.613)                | 2.741 (1.445-5.200)                |
| ATV011    | 0.836 (0.652-1.071)                | 1.012 (0.895-1.145)                |
| ATV013    | 0.964 (0.847-1.098)                | 1.324 (1.083-1.619)                |
| ATV017    | 0.905 (0.818-1.002)                | 1.173 (1.005-1.368)                |

\* denotes  $\mu\text{M}$

**Table S5. The pKa, LogP, and solubility testing results of ATV006**

| Compound ID | pKa Value (Basic) | LogP Value | Solubility ( $\mu\text{g/mL}$ ) |
|-------------|-------------------|------------|---------------------------------|
| ATV006      | 3.66              | 0.86       | 686.02                          |

**Table S6. Changes in cytokine transcripts after infection.**

|               | (SARS-CoV-2 K18-hACE2 mouse model-lung)<br>Vehicle/ATV006 fold change + standard error of<br>the mean | P      |
|---------------|-------------------------------------------------------------------------------------------------------|--------|
| <i>Ifnb</i>   | 5.85±4.59                                                                                             | 0.1963 |
| <i>Ifng</i>   | 25.56±17.77                                                                                           | 0.0605 |
| <i>Cxcl10</i> | 43.19±20.74                                                                                           | 0.1008 |
| <i>Ccl2</i>   | 24.69±25.14                                                                                           | 0.2245 |
| <i>Il6</i>    | 3.14±2.37                                                                                             | 0.7137 |
| <i>Il1β</i>   | 0.66±0.01                                                                                             | 0.4484 |

**Table S7. qPCR primers (P) and probes (Prb) used for detection of viral genomes and indicated genes.**

| Gene                  |     | Sequence (5'-3')         |
|-----------------------|-----|--------------------------|
| DA'AN<br>SARS-COV-2-N | FP  | AAGAAATTCAACTCCAGGCAGC   |
|                       | RP  | GCTGGTTCAATCTGTCAAGCAG   |
|                       | Prb | TCACCGCCATTGCCAGCCA      |
| SARS-COV-2<br>sgN     | FP  | CCAGGTAACAAACCAACAA      |
|                       | RP  | TGAGTGAGAGCGGTGAACCAA    |
| <i>Gapdh</i>          | FP  | AGAACATCATCCCTGCATCC     |
|                       | RP  | CACATTGGGGGTAGGAACAC     |
| <i>Il6</i>            | FP  | AACCAAGAGATAAGCTGGAGTCAC |
|                       | RP  | AACGCACTAGGTTTGCCGAG     |
| <i>Il1b</i>           | FP  | TGCCACCTTTTGACAGTGATGA   |
|                       | RP  | ATCAGGACAGCCCAGGTCAA     |
| <i>Cxcl10</i>         | FP  | TGCAGGATGATGGTCAAGCC     |
|                       | RP  | CCACTTGAGCGAGGACTCAG     |
| <i>Ifng</i>           | FP  | CAGCAAGGCGAAAAAGGATGC    |
|                       | RP  | CTTCCTGAGGCTGGATTCCG     |
| <i>Ifnb</i>           | FP  | GTGGGAGATGTCCTCAACTGC    |
|                       | RP  | TCTCTGCTCGGACCACCATC     |
| <i>Ccl2</i>           | FP  | TGGGCCTGTTGTTACAGT       |
|                       | RP  | TTCTCCAGCCGACTCATTG      |
